# Supplementary material for: Single-particle dispersion of carbon dots in the nano-hydroxyapatite lattice achieving solid-state green fluorescence
Source: Royal Society of Chemistry journal article supplement (doi:10.1039/d3na00106g), 2023-01-01
Supplement: d3na00106g1.pdf [file d3na00106g1.pdf]

Supporting Information

**Single-particle dispersion of carbon dots in nano-  
hydroxyapatite lattice achieving solid-state green  
fluorescence**

Lunzhu Wang, † Xinru Wang, † Shuoshuo Zhou, Jian Ren, Liting Liu, Cairong Xiao, Chunlin  
Deng \*

School of Materials Science and Engineering, National Engineering Research Center for Tissue Restoration and  
Reconstruction, South China University of Technology.

\* Corresponding Authors (E-mail: chldeng@163.com)

† These authors contributed equally to this study and should be considered co-first authors.

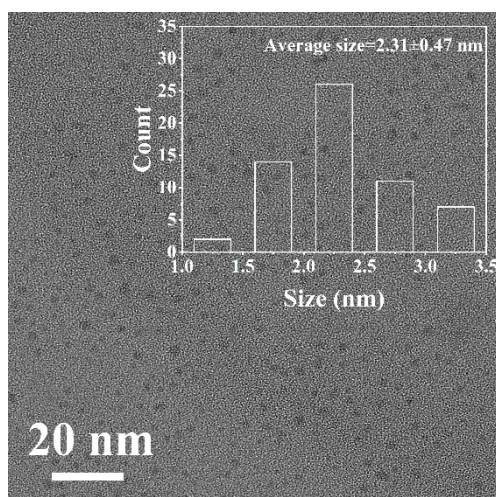

Figure S1. TEM and size distribution of CDs.

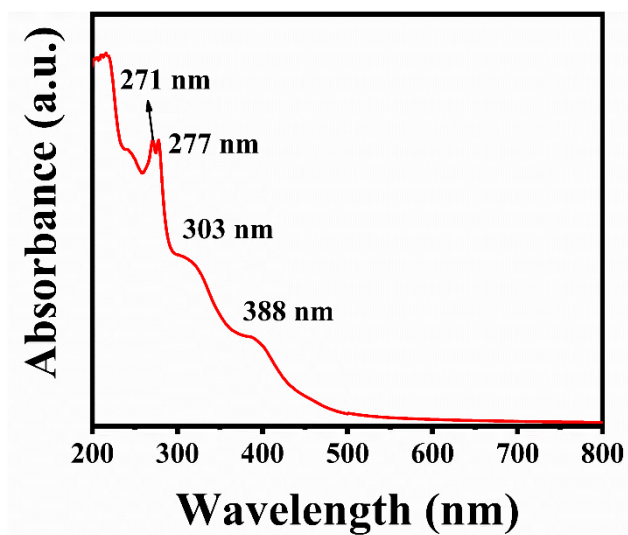

Figure S2. UV-Vis absorption spectrum of CDs solution.

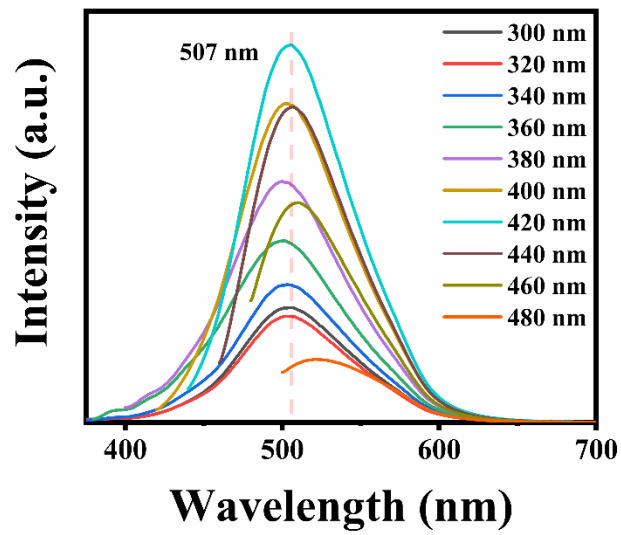

Figure S3. Fluorescence spectrum of CDs solution with pH=1 and 300 nm-480 nm excitation.

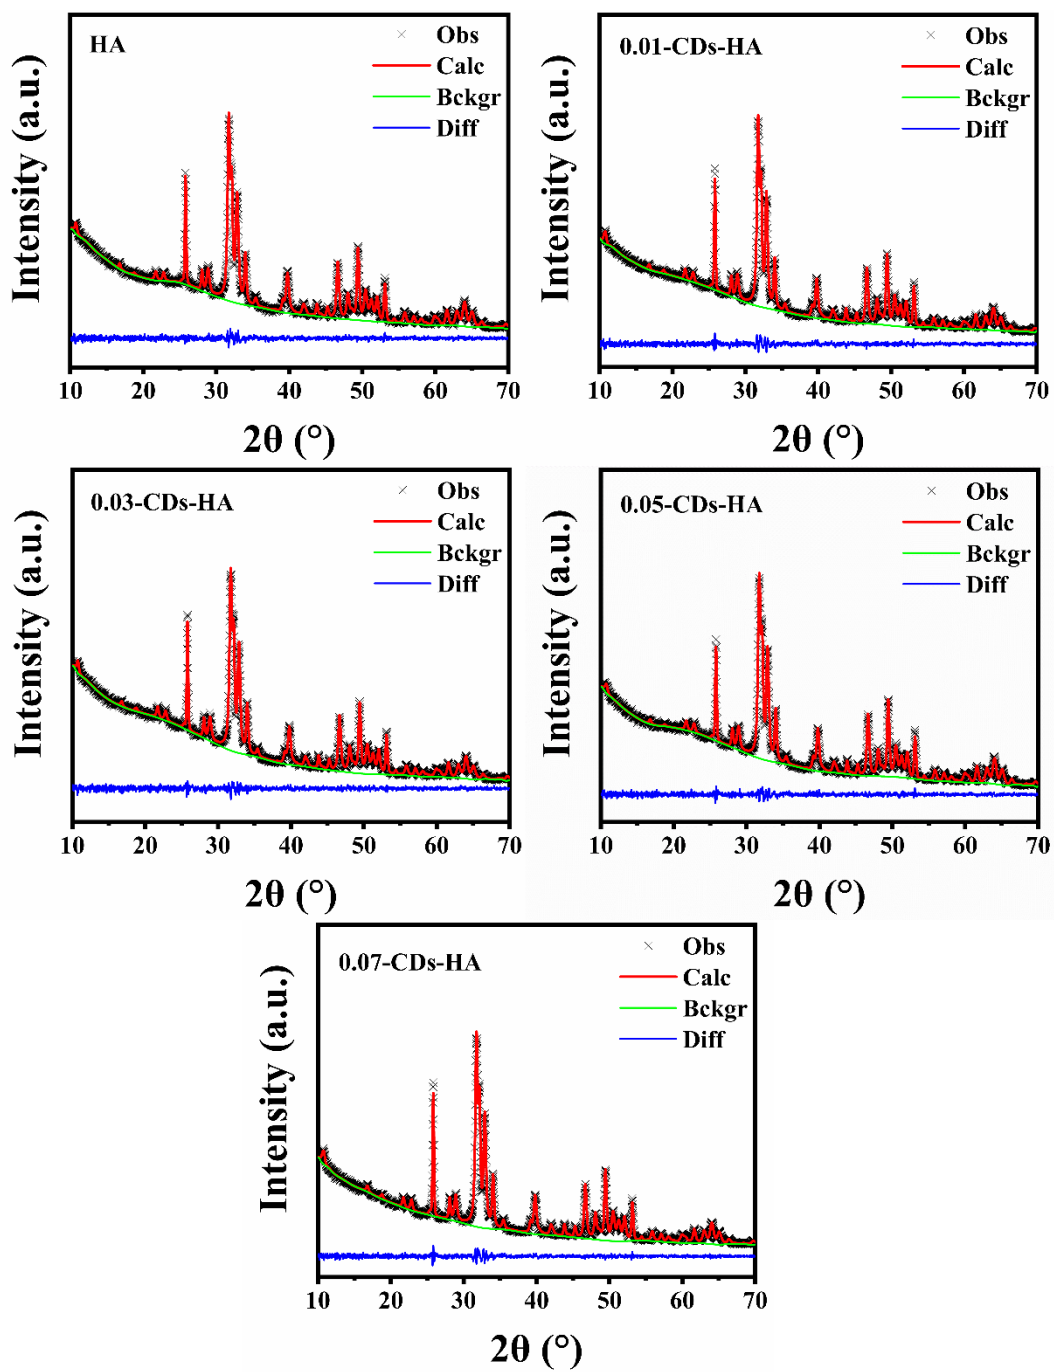

Figure S4. Rietveld refinement diagrams of HA and CDs-HA.

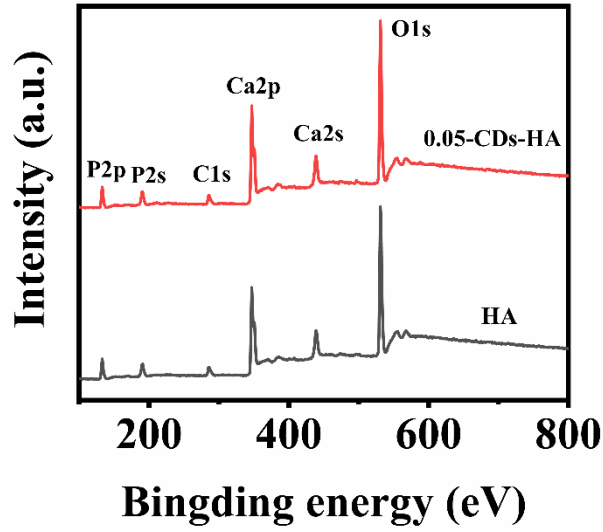

Figure S5. XPS full spectra of HA and 0.05-CDs-HA.

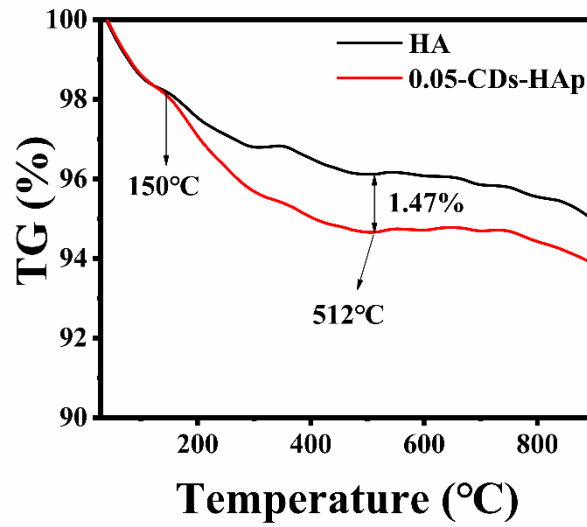

Figure S6. Thermogravimetric curves of HA and 0.05-CDs-HA.

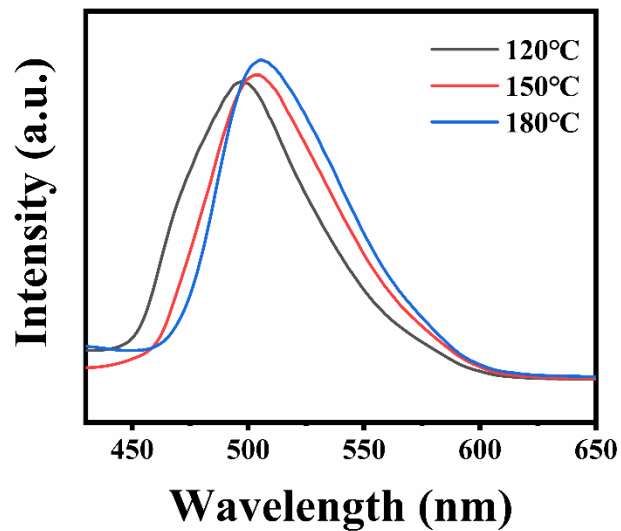

Figure S7. Fluorescence spectra of 0.05-CDs-HA120, 0.05-CDs-HA and 0.05-CDs-HA180 excited at 365 nm.

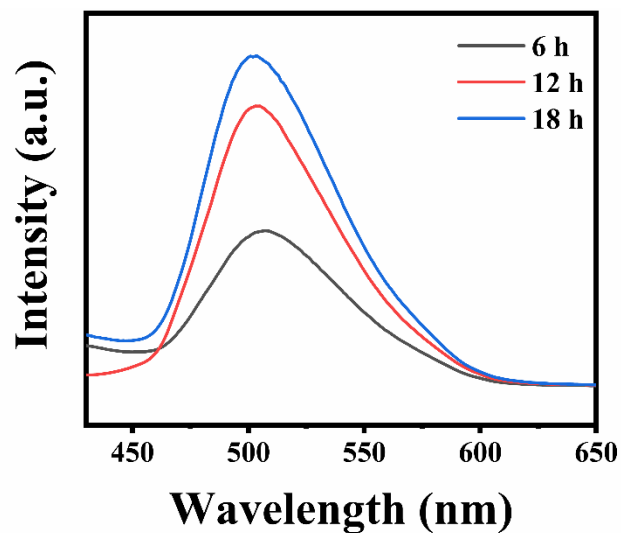

Figure S8. Fluorescence spectra of 0.05-CDs-HA6, 0.05-CDs-HA and 0.05-CDs-HA18 excited at 365 nm.
